# Supplementary material
Source: publisher figshare collection journal article supplement (https://plos.figshare.com/articles/dataset/_/125200)
Supplement: Supplementary file [file 1]

**Table S1**

DNA oligos used in this study. Restriction sites are underlined.

| Oligos                                      | Sequence (5'→ 3')                                                         | Source     |
|---------------------------------------------|---------------------------------------------------------------------------|------------|
| <b>Gene amplification</b>                   |                                                                           |            |
| SVB91<br>(Mtb <i>XPB</i> -F)                | <u>cgtctaga</u> aataattttgtttaactttaagaaggagatataccatgcagtcgataagacggtgct | This study |
| SVB92<br>(Mtb <i>XPB</i> -R)                | gcctc <u>gaga</u> attgccgggccagcaggt                                      | This study |
| Mtb <i>ssb</i> -F                           | cgtctaga <u>aata</u> attttgtttaactttaagaaggagatataccatggctggtgacaccac     | This study |
| Mtb <i>ssb</i> -R                           | <u>cgtcga</u> gaatggcggttcgcat                                            | This study |
| SVB107-F ( <i>E. coli</i> <i>K12 recQ</i> ) | <u>cgaagctt</u> atggcgcaggcggaagtgttg                                     | This study |
| SVB108-R ( <i>E. coli</i> <i>K12 recQ</i> ) | <u>cgtcga</u> gctactcttcgcatcgccat                                        | This study |
| <b>Assay substrates</b>                     |                                                                           |            |
| T4                                          | GACGCTGCCGAATTCTACCAGTGCCTTGCTAGGACATCTTTGCCCA                            | (1)        |
| B4                                          | CTAGACAGCTCCATGTAGCAAGGCACTGGTAGAATTCGGCAGCGT                             | (1)        |
| T1                                          | GACGCTGCCGAATTCTACCAGTGCCTTGCTAGGACATCTTTGCCACCTGCAG<br>GTTACCCC          | (1)        |
| B1                                          | ATCGATAGTCGGATCCTCTAGACAGCTCCATGTAGCAAGGCACTGGTAGAATT<br>CGGCAGCGT        | (1)        |
| B2                                          | GGGTGAACCTGCAGGTGGGCAAAGATGTCCTAGCAAGGCACTGGTAG<br>AATTCGGCAGCGTC         | This study |
| B3                                          | GGGTGAACCTGCAGGTGGGCCCCACGACGACGATGGAAACCTGGTAG<br>AATTCGGCAGCGTC         | This study |
| B5                                          | TAGCAAGGCACTGGTAGAATTCGGCAGCGT                                            | This study |
| B6                                          | ACGCTGCCGAATTCTACCAGTGCCTTGCTA                                            | This study |
| A                                           | CGTGACATGCCGTGACTAGCTTTTTTTTTTTTTTTTTTTTTT                                | (2)        |
| B                                           | GCTAGTCACGGCATGTCACG                                                      | (2)        |
| C                                           | TTTTTTTTTTTTTTTTTTTTTCGTGACATGCCGTGACTAGC                                 | (2)        |
| A0                                          | CGTGACATGCCGTGACTAGC                                                      | This study |
| A5                                          | CGTGACATGCCGTGACTAGCTTTTTT                                                | This study |
| A10                                         | CGTGACATGCCGTGACTAGCTTTTTTTTTT                                            | This study |
| A15                                         | CGTGACATGCCGTGACTAGCTTTTTTTTTTTTTT                                        | This study |
| A25                                         | CGTGACATGCCGTGACTAGCTTTTTTTTTTTTTTTTTTTTTT                                | This study |
| RF1                                         | GTCGGATCCTCTAGACAGCTCCATGATCACTGGCACTGGTAGAATTCGGC                        | (3)        |
| RF2                                         | CAACGTCATAGACGATTACATTGCTACATGGAGCTGTCTAGAGGATCCGA                        | (3)        |
| RF3                                         | TAGCAATGTAATCGTCTATGACGTT                                                 | (3)        |
| RF4                                         | TGCCGAATTCTACCAGTGCCAGTGAT                                                | (3)        |
| HJ1                                         | GACGCTGCCGAATTCTGGCTTGCTAGGACATCTTTGCCACGTTGACCC                          | (4)        |
| HJ2                                         | TGGGTCAACGTGGGCAAAGATGTCCTAGCAATGTAATCGTCTATGACGTT                        | (4)        |
| HJ3                                         | CAACGTCATAGACGATTACATTGCTAGGACATGCTGTCTAGAGACTATCGA                       | (4)        |
| HJ4                                         | ATCGATAGTCTCTAGACAGCATGTCCTAGCAAGCCAGAATTCGGCAGCGT                        | (4)        |
| D1                                          | GGGTGAACCTGCAGGTGGGCGGCTGCTCATCGTAGGTTAGTTGGTAGAATTCG<br>GCAGCGTC         | (5)        |

|     |                                                                                      |            |
|-----|--------------------------------------------------------------------------------------|------------|
| D2  | GACGCTGCCGAATTCTACCAAGTGCCTTGCTAGGACATCTTTGCCCACCTGCAG<br>GTTCACCC                   | (5)        |
| D3  | TAAGAGCAAGATGTTCTATAAAAGATGTCCTAGCAAGGCAC                                            | (5)        |
| D4  | AAAGATGTCCTAGCAAGGCACGATCGACCGGATATCTATGA                                            | (5)        |
| D5  | AAAGATGTCCTAGCAAGGCAC                                                                | This study |
| R1  | TAAGAGCAAGATGTTCTATAAAAGATGTCCTAGCAAGGCAC                                            | This study |
| R2  | AAAGATGTCCTAGCAAGGCACGATCGACCGGATATCTATGA                                            | This study |
| C80 | GCTGATCAACCCTACATGTGTAGGTAACCCTAACCCTAACCCTAAGGACAACC<br>CTAGTGAAGCTTGTAACCCTAGGAGCT | (6)        |
| G80 | AGCTCCTAGGGTTACAAGCTTCACTAGGGTTGTCCTTAGGGTTAGGGTTAGGG<br>TTACCTACACATGTAGGGTTGATCAGC | (6)        |

## References:

1. Rossi, M. L., Ghosh, A. K., Kulikowicz, T., Croteau, D. L., and Bohr, V. A. (2010) *DNA Repair (Amst)* **9**, 796-804
2. Biswas, T., Pero, J. M., Joseph, C. G., and Tsodikov, O. V. (2009) *Biochemistry* **48**, 2839-2848
3. McGlynn, P., and Lloyd, R. G. (2001) *Proc Natl Acad Sci U S A* **98**, 8227-8234
4. Lloyd, R. G., and Sharples, G. J. (1993) *Embo J* **12**, 17-22
5. McGlynn, P., Al-Deib, A. A., Liu, J., Mariani, K. J., and Lloyd, R. G. (1997) *J Mol Biol* **270**, 212-221
6. Machwe, A., Xiao, L., Groden, J., Matson, S. W., and Orren, D. K. (2005) *J Biol Chem* **280**, 23397-23407
