# Supplementary material
Source: publisher figshare collection journal article supplement (https://plos.figshare.com/articles/dataset/_/125200)
Supplement: Supplementary file [file 1]

**Table S2.** Summary of DNA unwinding activity of Mtb XPB.

| Substrate name                                  | Oligonucleotide combination | Structure                                                                            | Unwinding activity |
|-------------------------------------------------|-----------------------------|--------------------------------------------------------------------------------------|--------------------|
| Blunt end duplex                                | A <sub>0</sub> +B*          |    | -                  |
| 3'-overhang                                     | A+B*                        |    | +                  |
| 5'-overhang                                     | C+B*                        |    | -                  |
| Fork                                            | T4*+B4/T1*+B1               |    | +                  |
| 3' flap                                         | RF1+RF2+RF3*                |    | +                  |
| 5' flap                                         | RF1+RF2+RF4*                |    | -                  |
| Nicked 3-way junction                           | RF1+RF2+RF3*+RF4            |   | -                  |
| Holliday junction                               | HJ1*+HJ2+HJ3+HJ4            |  | -                  |
| Bubble                                          | D1+D2*                      |  | -                  |
| D-loop with fully complementary invading strand | D1+D2+D5*                   |  | -                  |
| 3'-tailed D-loop                                | D1+D2+D4*                   |  | +                  |
| 3'-tailed R-loop                                | D1+D2+R2*                   |  | -                  |
| 5'-tailed D-loop                                | D1+D2+D3*                   |  | -                  |
| 5'-tailed R-loop                                | D1+D2+R1*                   |  | -                  |

\* -indicates the 5'-end-labeled substrates
